# Supplementary material for: The effect of comb architecture on complex coacervation
Source: Royal Society of Chemistry journal article supplement (doi:10.1039/c7ob01314k), 2017-01-01
Supplement: c7ob01314k1.pdf [file c7ob01314k1.pdf]

## Supporting Information

### The Effect of Comb Architecture on Complex Coacervation

*Brandon M. Johnston,<sup>1</sup> Cameron W. Johnston,<sup>1</sup> Rachel A. Letteri,<sup>2</sup> Tyler K. Lytle,<sup>3</sup> Charles E. Sing,<sup>4</sup> Todd Emrick,<sup>2</sup> Sarah L. Perry<sup>1\*</sup>*

<sup>1</sup>Department of Chemical Engineering, University of Massachusetts Amherst, Amherst, MA 01003, USA

<sup>2</sup>Department of Polymer Science & Engineering, University of Massachusetts Amherst, Amherst, MA 01003, USA

<sup>3</sup>Department of Chemistry, University of Illinois at Urbana-Champaign, Urbana, IL 61801

<sup>4</sup>Department of Chemical & Biomolecular Engineering, University of Illinois at Urbana-Champaign, Urbana, IL 61801

\*Correspondence Email: [perrys@engin.umass.edu](mailto:perrys@engin.umass.edu)

**Table S1.** Polymerization data, and monomer:catalyst ratios used to synthesize **LK5SB-X** (X = mol% SB)

| Polymer  | Target mol% SB | [M]:[I] | [M] (M) | Conversion (%) | Incorporated mol% SB | M <sub>n,theo</sub> <sup>a</sup> (g/mol) | M <sub>n</sub> <sup>b</sup> (g/mol) | D <sup>b</sup> | Yield <sup>c</sup> (%) |
|----------|----------------|---------|---------|----------------|----------------------|------------------------------------------|-------------------------------------|----------------|------------------------|
| LK5      | 0              | 50      | 0.07    | 62             | 0                    | 31000                                    | 33400                               | 1.30           | 60                     |
| LK5SB-26 | 20             | 62.5    | 0.09    | 73             | 26                   | 38600                                    | 42900                               | 1.35           | 48                     |
| LK5SB-44 | 40             | 83.3    | 0.12    | 77             | 44                   | 50500                                    | 44500                               | 1.45           | 47                     |
| LK5SB-65 | 60             | 125     | 0.5     | 88             | 65                   | 68500                                    | 43900                               | 1.52           | 24                     |
| LK5SB-88 | 80             | 250     | 0.5     | N/A            | 88                   | 126500                                   | 126000                              | 1.77           | 22                     |

<sup>a</sup>M<sub>n,theo</sub> = ([monomer]:[initiator])\*conversion\*(molecular weight per repeat unit), assuming 100% conversion for LK5SB-88

<sup>b</sup>Estimated relative to PMMA standards by SEC eluting in TFE with 0.02 M sodium trifluoroacetate

<sup>c</sup>Yield = (conversion)(mixture of monomer and polymer used in deprotection, g)/(average MW per repeat unit deprotected polymers, g/mol)/(average MW per repeat unit Boc-protected polymers, g/mol)

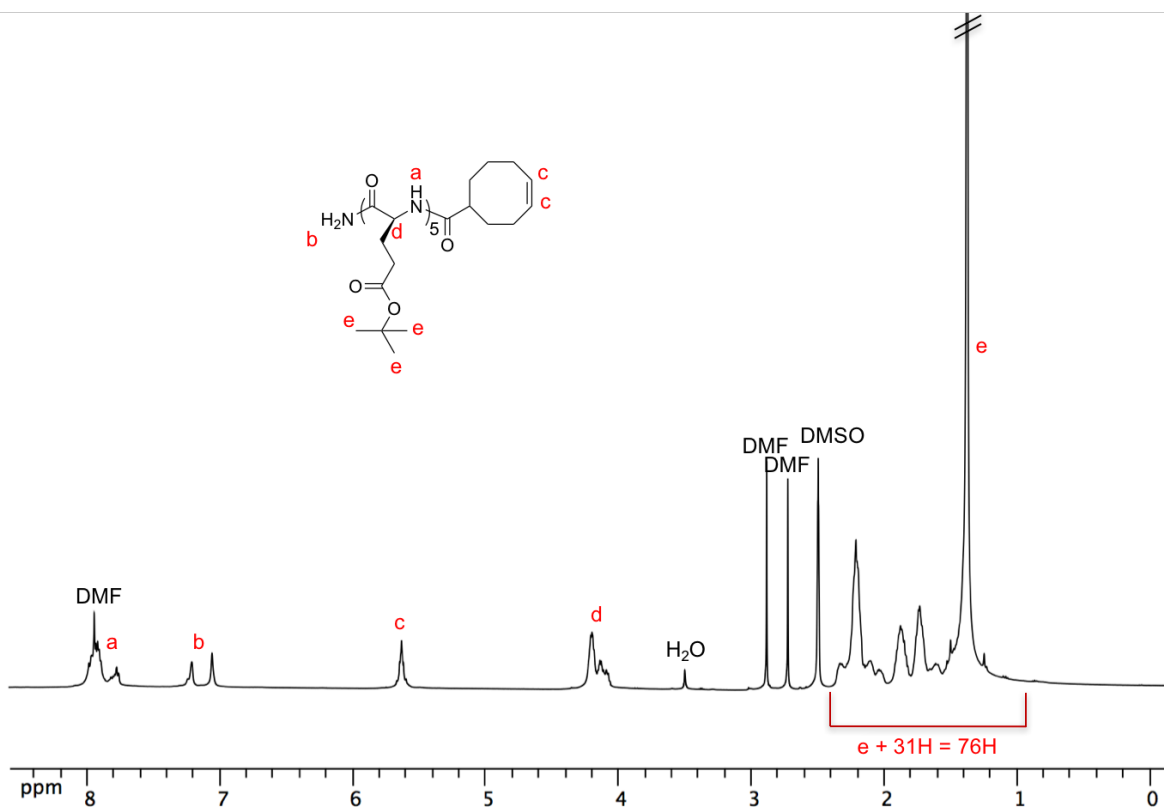

**Figure S1.** <sup>1</sup>H NMR spectrum (500 MHz) of **LE5-COE** in DMSO-d<sub>6</sub>

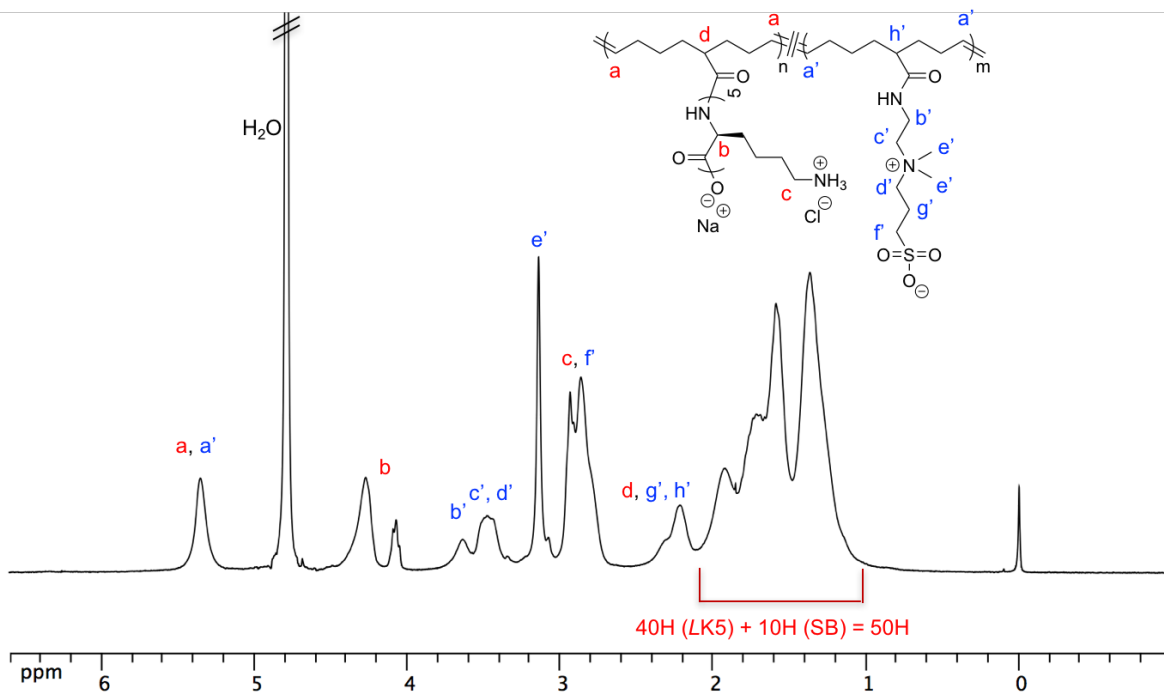

**Figure S2.** <sup>1</sup>H NMR spectrum (300 MHz) of **LK5SB-44** in D<sub>2</sub>O

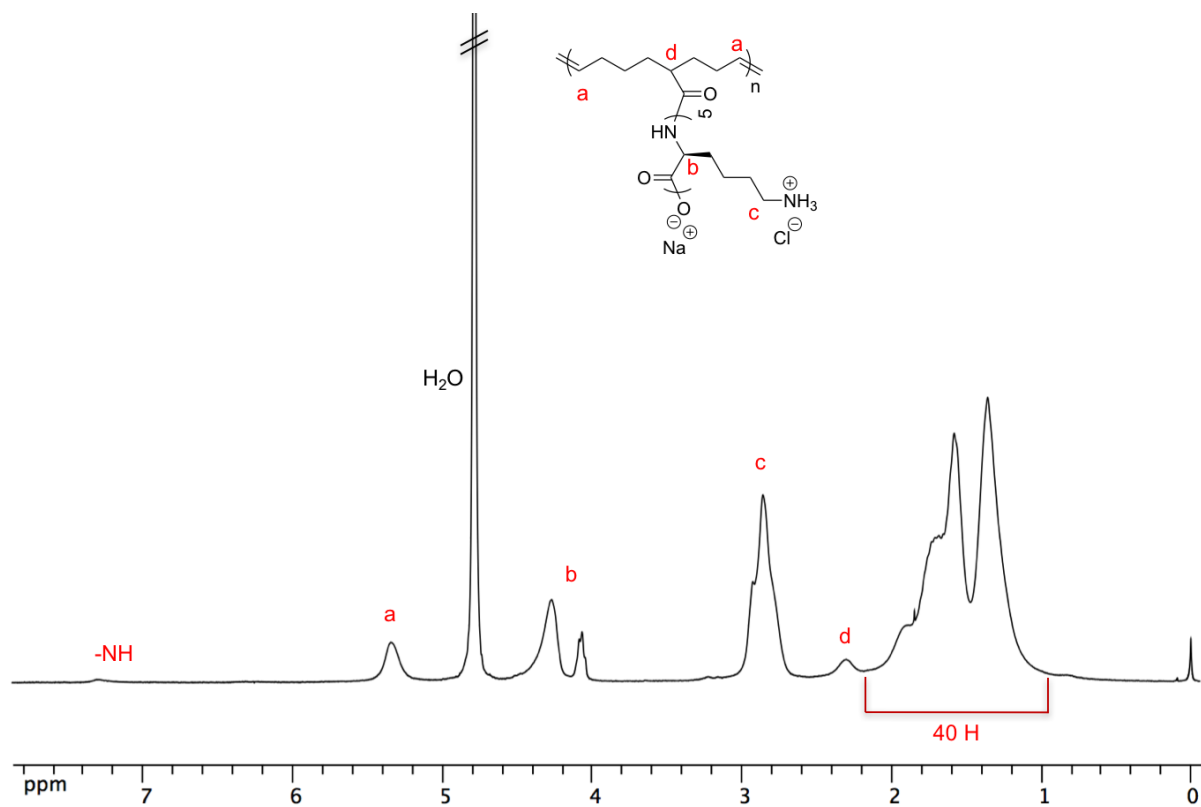

**Figure S3.**  $^1\text{H}$  NMR spectrum (300 MHz) of **LK5** in  $\text{D}_2\text{O}$

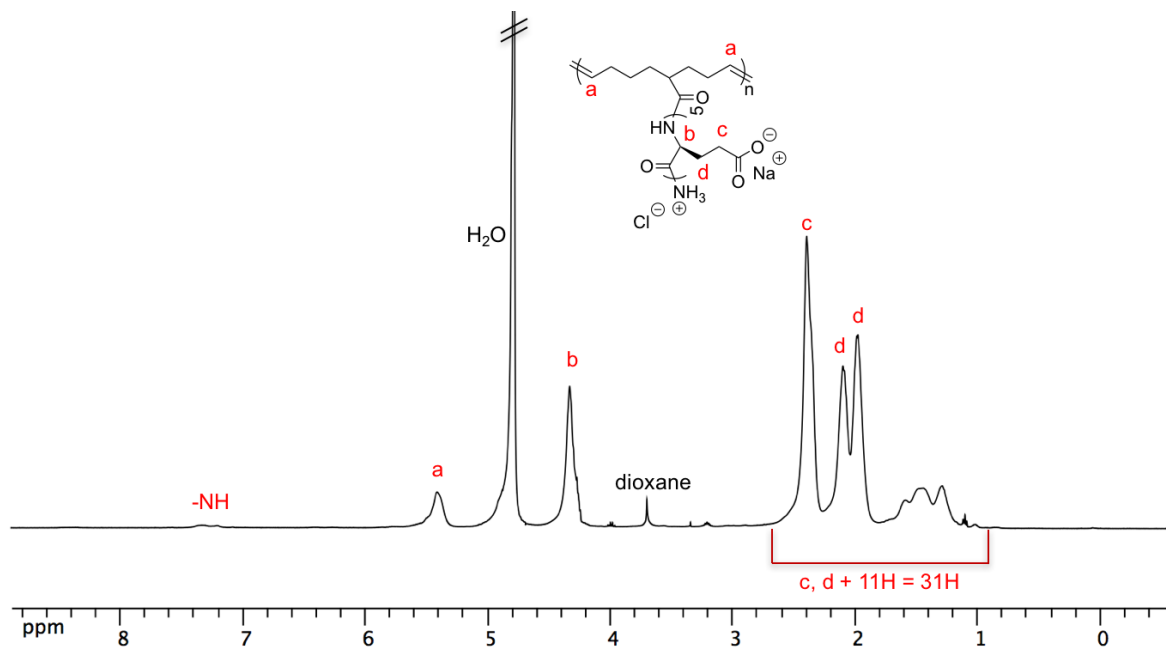

**Figure S4.**  $^1\text{H}$  NMR spectrum (500 MHz) of **LE5** in  $\text{D}_2\text{O}$

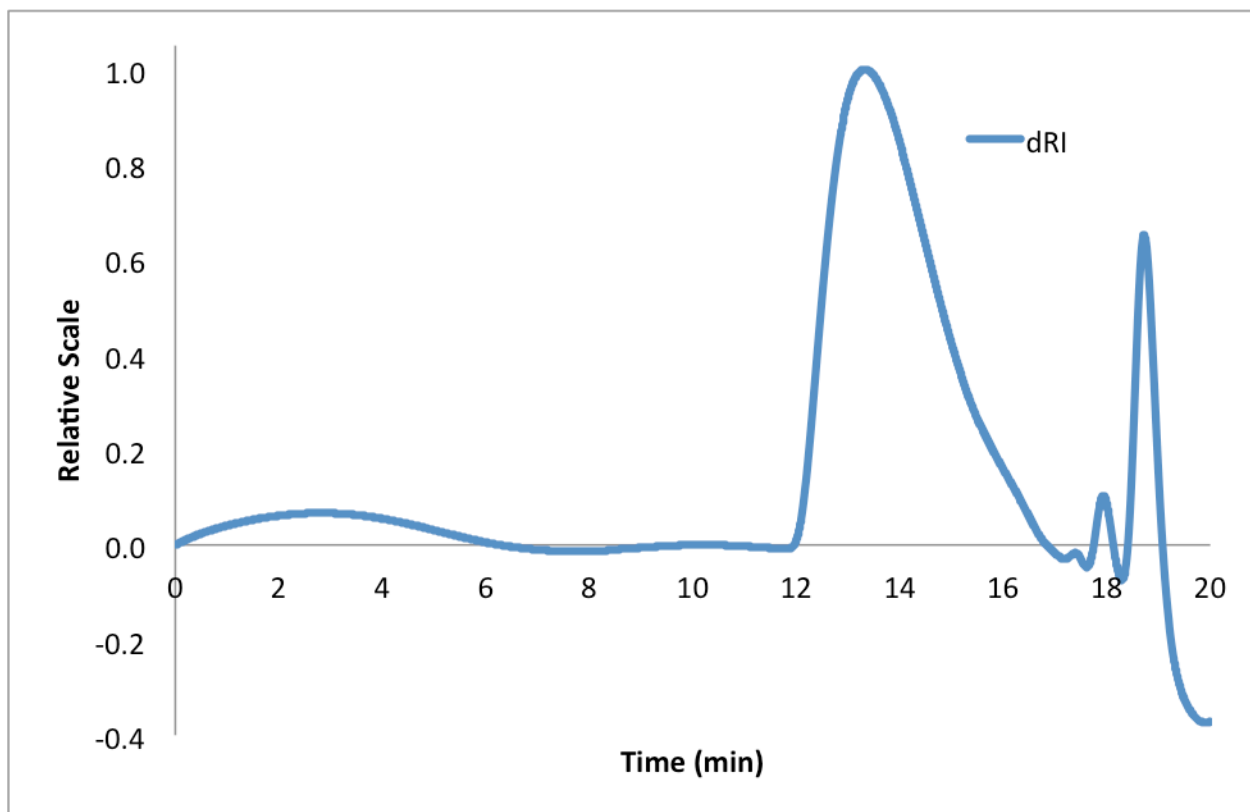

**Figure S5.** SEC-MALS trace of **LE5** in aqueous solution with 5% ammonium phosphate and 3% acetonitrile

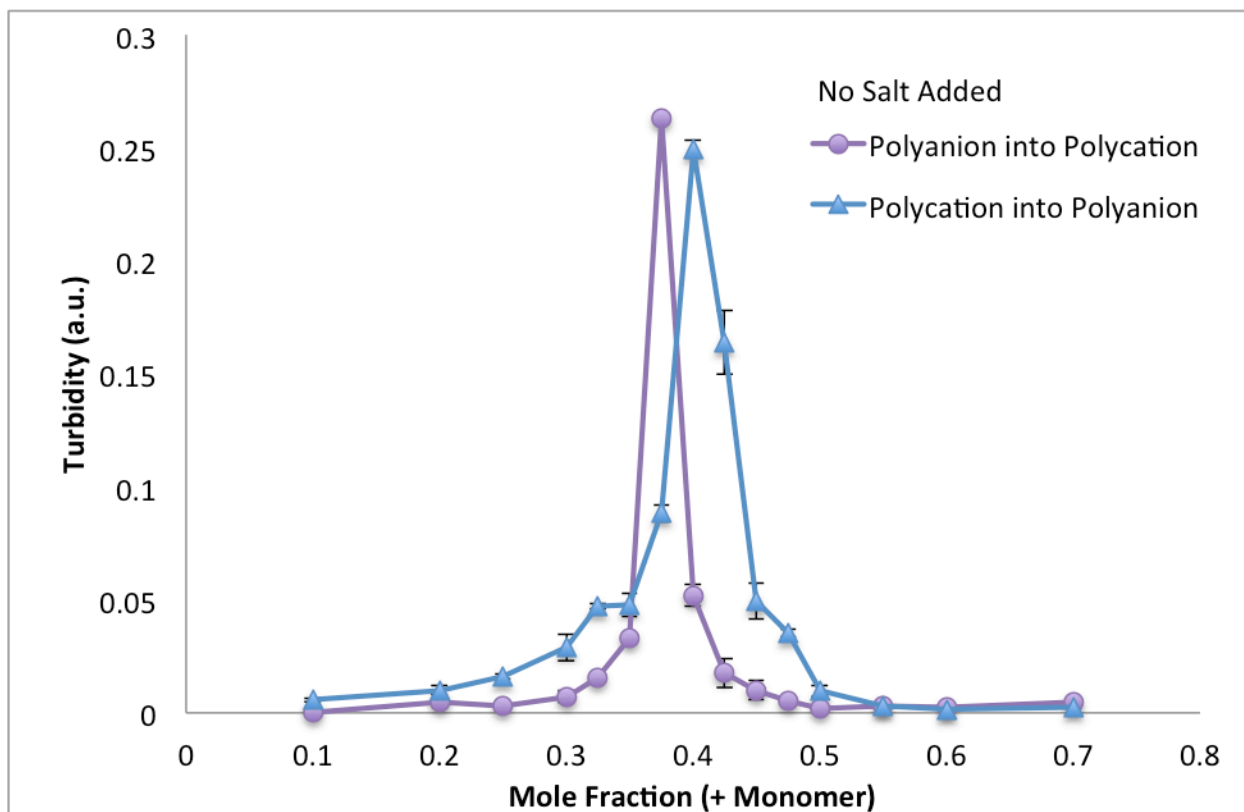

**Figure S6.** Plot of turbidity as a function of the mole fraction of cationic monomer comparing orders of addition during complex formation (polycation into polyanion or polyanion into polycation)
